# Supplementary material
Source: PubMed Central journal article supplement (PMC3316475)
Supplement: NIHMS188061-supplement-Supplementary_Table.pdf [file NIHMS188061-supplement-Supplementary_Table.pdf]

Supplementary Table 1  
 Quantitative real-time PCR primers used in this study

| Name     | Sequence                                                                    |
|----------|-----------------------------------------------------------------------------|
| SREBP-2  | Forward 5'-GCGTTCTGGAGACCATGGA<br>Reverse 5'-ACAAAGTTGCTCTGAAAACAAATCA      |
| LDLR     | Forward 5'-GTCAGTCCAATCAATTCAGC<br>Reverse 5'-TCTCGGTCTCCATCACAC            |
| HMG Red  | Forward 5'-CTTGTGGAATGCCTTGTGATTG<br>Reverse 5'-AGCCGAAGCAGCACATGAT         |
| HMG Syn  | Forward 5'-GCCGTGAACTGGGTCGAA<br>Reverse 5'-GCATATATAGCAATGTCTCCTGCAA       |
| ABCA1    | Forward 5'-GGTTTGGAGATGGTTATACAATAGTTGT<br>Reverse 5'-CCCGGAAACGCAAGTCC     |
| SREBP-1c | Forward 5'-GGAGCCATGGATTGCACATT<br>Reverse 5'-GGCCCGGGAAGTCACTGT            |
| 18S      | Forward 5'-CGG CTA CCA CAT CCA AGG AA<br>Reverse 5'-AGC TGG AAT TAC CGC GGC |
